# Supplementary material
Source: bioRxiv or medRxiv preprint supplement (https://www.biorxiv.org/highwire/filestream/137391/field_highwire_adjunct_files/4/361105-5.pdf)
Supplement: Supplementary file [file 361105-5.pdf]

| <b>GiardiaDB</b> | <b>annotation</b>            | <b>MW (kDa)</b> | <b>PFAM</b>   | <b>P1_1</b> | <b>P1_2</b> | <b>S2_1</b> | <b>S2_3</b> | <b>S3_1</b> | <b>S3_3</b> | <b>P3_1</b> | <b>&gt;5h P1</b> | <b>&gt;5h S2</b> | <b>&gt;5h S3</b> | <b>&gt;5h P3</b> |
|------------------|------------------------------|-----------------|---------------|-------------|-------------|-------------|-------------|-------------|-------------|-------------|------------------|------------------|------------------|------------------|
| GL50803_4812     | beta giardin                 | 31              | SF-assemblin  | 191         | 44          | 242         | 153         | 511         | 92          | 239         | P1               | S2               | S3               | P3               |
| GL50803_101291   | beta-tubulin 1               | 50              | tubulin       | 503         | 42          | 0           | 235         | 0           | 120         | 179         | P1               | S2               | S3               | P3               |
| GL50803_17230    | gamma giardin                | 36              | none          | 105         | 12          | 83          | 69          | 232         | 38          | 124         | P1               | S2               | S3               | P3               |
| GL50803_103676   | alpha tubulin 1              | 51              | tubulin       | 360         | 40          | 0           | 122         | 0           | 59          | 75          | P1               | S2               | S3               | P3               |
| GL50803_16343    | median body protein          | 101             | none          | 70          | 31          | 195         | 94          | 268         | 58          | 72          | P1               | S2               | S3               | P3               |
| GL50803_15499    | hypothetical protein         | 49              | none          | 23          | 14          | 20          | 14          | 13          | 4           | 36          | P1               | S2               | S3               | P3               |
| GL50803_86676    | delta-giardin                | 34              | SF-assemblin  | 50          | 7           | 130         | 69          | 171         | 48          | 33          | P1               | S2               | S3               | P3               |
| GL50803_10524    | hypothetical protein         | 27              | none          | 28          | 8           | 29          | 15          | 53          | 7           | 33          | P1               | S2               | S3               | P3               |
| GL50803_7444     | hypothetical protein         | 41              | none          | 31          | 16          | 79          | 28          | 55          | 12          | 29          | P1               | S2               | S3               | P3               |
| GL50803_4410     | SALP-1                       | 29              | SF assemblin  | 24          | 1           | 55          | 42          | 67          | 34          | 25          | P1               | S2               | S3               | P3               |
| GL50803_13475    | GASP-180 family protein      | 236             | ankyrin       | 20          | 21          | 189         | 55          | 55          | 26          | 25          | P1               | S2               | S3               | P3               |
| GL50803_16532    | ankyrin repeat protein       | 93              | ankyrin       | 46          | 36          | 141         | 38          | 23          | 15          | 25          | P1               | S2               | S3               | P3               |
| GL50803_16844    | hypothetical protein         | 35              | none          | 29          | 9           | 3           | 9           | 23          | 0           | 25          | P1               | S2               | S3               | P3               |
| GL50803_9515     | ankyrin repeat protein       | 150             | ankyrin       | 32          | 37          | 227         | 66          | 31          | 20          | 24          | P1               | S2               | S3               | P3               |
| GL50803_12139    | ankyrin repeat protein       | 76              | ankyrin       | 42          | 19          | 80          | 46          | 136         | 42          | 21          | P1               | S2               | S3               | P3               |
| GL50803_16935    | hypothetical protein         | 94              | none          | 11          | 5           | 2           | 5           | 7           | 3           | 21          | P1               | S2               | S3               | P3               |
| GL50803_10808    | hypothetical protein         | 25              | none          | 9           | 0           | 0           | 8           | 0           | 6           | 20          | P1               | S2               | S3               | P3               |
| GL50803_91354    | SHIPPO repeat family protein | 63              | SHIPPO-repeat | 14          | 31          | 16          | 11          | 3           | 5           | 20          | P1               | S2               | S3               | P3               |
| GL50803_137716   | GASP-180 family protein      | 175             | ankyrin       | 387         | 63          | 662         | 560         | 94          | 66          | 19          | P1               | S2               | S3               | P3               |
| GL50803_5883     | hypothetical protein         | 63              | none          | 32          | 26          | 118         | 43          | 19          | 23          | 19          | P1               | S2               | S3               | P3               |
| GL50803_17551    | ankyrin repeat protein       | 119             | ankyrin       | 80          | 72          | 224         | 98          | 47          | 14          | 19          | P1               | S2               | S3               | P3               |
| GL50803_17468    | hypothetical protein         | 36              | none          | 10          | 10          | 13          | 5           | 19          | 4           | 19          | P1               | S2               | S3               | P3               |
| GL50803_14921    | hypothetical protein         | 55              | none          | 11          | 18          | 6           | 8           | 5           | 2           | 16          | P1               | S2               | S3               | P3               |
| GL50803_8726     | hypothetical protein         | 106             | none          | 8           | 19          | 142         | 34          | 15          | 26          | 14          | P1               | S2               | S3               | P3               |
| GL50803_4852     | hypothetical protein         | 49              | none          | 13          | 22          | 19          | 10          | 67          | 4           | 13          | P1               | S2               | S3               | P3               |
| GL50803_16424    | Mlf1IP domain protein        | 30              | Mlf1IP        | 13          | 2           | 11          | 19          | 8           | 0           | 11          | P1               | S2               | S3               | P3               |
| GL50803_113622   | ankyrin repeat protein       | 164             | ankyrin       | 25          | 7           | 49          | 26          | 62          | 3           | 10          | P1               | S2               | S3               | P3               |
| GL50803_41512    | DUF1126 domain               | 74              | DUF1126       | 20          | 3           | 0           | 6           | 11          | 0           | 9           | P1               | S2               | S3               | P3               |
| GL50803_9148     | SHIPPO repeat family protein | 22              | SHIPPO-repeat | 7           | 20          | 13          | 5           | 6           | 2           | 8           | P1               | S2               | S3               | P3               |
| GL50803_16996    | enkurin superfamily protein  | 46              | enkurin       | 8           | 1           | 7           | 5           | 5           | 0           | 8           | P1               | S2               | S3               | P3               |
| GL50803_24537    | hypothetical protein         | 59              | none          | 17          | 11          | 106         | 30          | 31          | 21          | 7           | P1               | S2               | S3               | P3               |
| GL50803_15410    | Ser/Thr protein kinase       | 32              | ankyrin       | 46          | 11          | 70          | 37          | 20          | 12          | 7           | P1               | S2               | S3               | P3               |
| GL50803_11165    | ankyrin repeat protein       | 82              | ankyrin       | 16          | 6           | 44          | 22          | 23          | 2           | 6           | P1               | S2               | S3               | P3               |

|                |                                 |     |          |     |    |     |     |    |    |    |    |    |    |    |
|----------------|---------------------------------|-----|----------|-----|----|-----|-----|----|----|----|----|----|----|----|
| GL50803_17046  | ankyrin repeat protein          | 75  | ankyrin  | 18  | 14 | 28  | 7   | 8  | 4  | 5  | P1 | S2 | S3 | P3 |
| GL50803_7268   | ankyrin repeat protein          | 126 | ankyrin  | 8   | 3  | 5   | 7   | 13 | 0  | 5  | P1 | S2 | S3 | P3 |
| GL50803_5188   | ankyrin repeat protein          | 57  | ankyrin  | 11  | 9  | 25  | 22  | 25 | 7  | 3  | P1 | S2 | S3 |    |
| GL50803_27925  | ankyrin repeat protein          | 88  | ankyrin  | 153 | 56 | 376 | 92  | 44 | 4  | 3  | P1 | S2 | S3 |    |
| GL50803_15409  | Nek kinase GK175                | 57  | kinase   | 164 | 23 | 63  | 122 | 9  | 21 | 2  | P1 | S2 | S3 |    |
| GL50803_16720  | radial spokehead family protein | 96  | rsp      | 13  | 0  | 41  | 8   | 5  | 2  | 2  | P1 | S2 | S3 |    |
| GL50803_17249  | hypothetical protein            | 191 | none     | 81  | 34 | 6   | 151 | 0  | 24 | 0  | P1 | S2 | S3 |    |
| GL50803_41212  | ankyrin repeat protein          | 149 | ankyrin  | 90  | 33 | 25  | 182 | 0  | 23 | 0  | P1 | S2 | S3 |    |
| GL50803_11654  | alpha1-giardin                  | 34  | annexin  | 121 | 11 | 34  | 67  | 2  | 13 | 0  | P1 | S2 | S3 |    |
| GL50803_13584  | hypothetical protein            | 44  | none     | 48  | 41 | 88  | 68  | 7  | 10 | 0  | P1 | S2 | S3 |    |
| GL50803_5489   | Nek kinase GK271                | 61  | kinase   | 7   | 1  | 2   | 5   | 28 | 8  | 0  | P1 | S2 | S3 |    |
| GL50803_15411  | Nek kinase GK292                | 78  | kinase   | 83  | 22 | 7   | 44  | 0  | 8  | 0  | P1 | S2 | S3 |    |
| GL50803_16745  | GASP-180 family protein         | 116 | ankyrin  | 117 | 54 | 21  | 195 | 0  | 7  | 0  | P1 | S2 | S3 |    |
| GL50803_14859  | ankyrin repeat protein          | 103 | ankyrin  | 99  | 45 | 419 | 147 | 60 | 6  | 0  | P1 | S2 | S3 |    |
| GL50803_9030   | ankyrin repeat protein          | 37  | ankyrin  | 48  | 35 | 92  | 113 | 6  | 6  | 0  | P1 | S2 | S3 |    |
| GL50803_10167  | hypothetical protein            | 133 | none     | 42  | 18 | 0   | 71  | 0  | 6  | 0  | P1 | S2 | S3 |    |
| GL50803_7796   | alpha2-giardin                  | 34  | annexin  | 17  | 4  | 38  | 32  | 0  | 6  | 0  | P1 | S2 | S3 |    |
| GL50803_17153  | alpha11-giardin                 | 35  | annexin  | 58  | 6  | 7   | 28  | 0  | 6  | 0  | P1 | S2 | S3 |    |
| GL50803_88369  | ankyrin repeat protein          | 92  | ankyrin  | 7   | 7  | 40  | 6   | 25 | 0  | 0  | P1 | S2 | S3 |    |
| GL50803_16648  | hypothetical protein            | 88  | none     | 22  | 5  | 0   | 12  | 0  | 2  | 24 | P1 | S2 |    | P3 |
| GL50803_13372  | TPH domain protein              | 55  | TPH      | 6   | 2  | 6   | 5   | 3  | 0  | 8  | P1 | S2 |    | P3 |
| GL50803_114462 | axonemal p66 (RSP6)             | 63  | ODA-DC 2 | 11  | 5  | 6   | 2   | 0  | 0  | 5  | P1 | S2 |    | P3 |
| GL50803_104685 | centrin                         | 20  | centrin  | 4   | 17 | 26  | 8   | 1  | 4  | 2  | P1 | S2 |    |    |
| GL50803_3582   | hypothetical protein            | 40  | none     | 4   | 6  | 6   | 6   | 0  | 2  | 2  | P1 | S2 |    |    |
| GL50803_9848   | dynein light chain              | 10  | LC8      | 16  | 2  | 9   | 17  | 3  | 0  | 2  | P1 | S2 |    |    |
| GL50803_17585  | ankyrin repeat protein          | 77  | ankyrin  | 22  | 24 | 78  | 18  | 2  | 4  | 0  | P1 | S2 |    |    |
| GL50803_11554  | Nek kinase GK249                | 32  | kinase   | 7   | 0  | 21  | 3   | 1  | 2  | 0  | P1 | S2 |    |    |
| GL50803_94463  | hypothetical protein            | 53  | none     | 27  | 20 | 42  | 49  | 0  | 2  | 0  | P1 | S2 |    |    |
| GL50803_14434  | ankyrin repeat protein          | 50  | ankyrin  | 16  | 11 | 0   | 21  | 0  | 2  | 0  | P1 | S2 |    |    |
| GL50803_17096  | ankyrin repeat protein          | 85  | ankyrin  | 5   | 5  | 44  | 11  | 0  | 2  | 0  | P1 | S2 |    |    |
| GL50803_8854   | hypothetical protein            | 70  | none     | 12  | 2  | 0   | 6   | 0  | 2  | 0  | P1 | S2 |    |    |
| GL50803_15035  | Nek kinase GK210                | 59  | kinase   | 10  | 1  | 0   | 6   | 0  | 2  | 0  | P1 | S2 |    |    |
| GL50803_16263  | conserved hypothetical protein  | 12  | none     | 2   | 6  | 18  | 11  | 1  | 0  | 0  | P1 | S2 |    |    |
| GL50803_113677 | hypothetical protein            | 255 | none     | 97  | 35 | 18  | 166 | 0  | 0  | 0  | P1 | S2 |    |    |

|                |                                |     |                 |    |    |    |    |   |   |   |    |    |
|----------------|--------------------------------|-----|-----------------|----|----|----|----|---|---|---|----|----|
| GL50803_115478 | hypothetical protein           | 80  | none            | 55 | 5  | 0  | 88 | 0 | 0 | 0 | P1 | S2 |
| GL50803_21444  | hypothetical protein           | 66  | none            | 18 | 14 | 34 | 54 | 0 | 0 | 0 | P1 | S2 |
| GL50803_9508   | metalloprotease                | 131 | insulinase      | 19 | 3  | 16 | 31 | 0 | 0 | 0 | P1 | S2 |
| GL50803_112112 | hypothetical protein           | 136 | none            | 11 | 3  | 40 | 28 | 0 | 0 | 0 | P1 | S2 |
| GL50803_14895  | hypothetical protein           | 72  | none            | 17 | 4  | 21 | 28 | 0 | 0 | 0 | P1 | S2 |
| GL50803_8174   | ankyrin repeat protein         | 94  | ankyrin         | 2  | 5  | 71 | 24 | 0 | 0 | 0 | P1 | S2 |
| GL50803_11118  | enolase                        | 48  | enolase         | 34 | 2  | 6  | 24 | 0 | 0 | 0 | P1 | S2 |
| GL50803_9720   | ankyrin repeat protein         | 113 | ankyrin         | 19 | 3  | 28 | 23 | 0 | 0 | 0 | P1 | S2 |
| GL50803_15953  | Nek kinase GK231               | 125 | kinase          | 20 | 0  | 39 | 22 | 0 | 0 | 0 | P1 | S2 |
| GL50803_33660  | ankyrin repeat protein         | 104 | ankyrin         | 5  | 7  | 0  | 21 | 0 | 0 | 0 | P1 | S2 |
| GL50803_7031   | hypothetical protein           | 109 | none            | 26 | 13 | 0  | 18 | 0 | 0 | 0 | P1 | S2 |
| GL50803_11390  | Nek kinase GK209               | 85  | kinase          | 36 | 7  | 0  | 18 | 0 | 0 | 0 | P1 | S2 |
| GL50803_103059 | dynein heavy chain             | 274 | DHC             | 15 | 4  | 29 | 17 | 0 | 0 | 0 | P1 | S2 |
| GL50803_93294  | ankyrin repeat protein         | 139 | ankyrin         | 3  | 5  | 0  | 17 | 0 | 0 | 0 | P1 | S2 |
| GL50803_32999  | hypothetical protein           | 51  | none            | 8  | 1  | 0  | 17 | 0 | 0 | 0 | P1 | S2 |
| GL50803_93551  | metalloprotease                | 129 | M16C protease   | 21 | 2  | 0  | 16 | 0 | 0 | 0 | P1 | S2 |
| GL50803_17265  | OAD-alpha dynein               | 302 | DHC             | 5  | 0  | 15 | 15 | 0 | 0 | 0 | P1 | S2 |
| GL50803_6081   | ankyrin repeat protein         | 132 | ankyrin         | 5  | 0  | 25 | 13 | 0 | 0 | 0 | P1 | S2 |
| GL50803_102034 | Nek kinase GK295               | 108 | kinase          | 7  | 0  | 0  | 13 | 0 | 0 | 0 | P1 | S2 |
| GL50803_17053  | ankyrin repeat protein         | 14  | ankyrin         | 12 | 6  | 31 | 12 | 0 | 0 | 0 | P1 | S2 |
| GL50803_11164  | ankyrin repeat protein         | 79  | ankyrin         | 6  | 16 | 22 | 11 | 0 | 0 | 0 | P1 | S2 |
| GL50803_14551  | alpha6-giardin                 | 33  | annexin         | 66 | 0  | 0  | 11 | 0 | 0 | 0 | P1 | S2 |
| GL50803_13133  | hypothetical protein           | 60  | none            | 0  | 14 | 40 | 10 | 0 | 0 | 0 | P1 | S2 |
| GL50803_17231  | Nek kinase GK186               | 111 | kinase, ankyrin | 3  | 16 | 38 | 10 | 0 | 0 | 0 | P1 | S2 |
| GL50803_16804  | dynein heavy chain             | 262 | DHC             | 10 | 1  | 7  | 10 | 0 | 0 | 0 | P1 | S2 |
| GL50803_8217   | uridine kinase                 | 66  | PRK             | 35 | 0  | 0  | 10 | 0 | 0 | 0 | P1 | S2 |
| GL50803_33218  | dynein intermediate chain IC78 | 84  | DIC             | 9  | 4  | 19 | 9  | 0 | 0 | 0 | P1 | S2 |
| GL50803_16549  | uridine kinase                 | 77  | PRK             | 15 | 2  | 0  | 9  | 0 | 0 | 0 | P1 | S2 |
| GL50803_5333   | calmodulin                     | 17  | EF-hand         | 0  | 14 | 35 | 8  | 0 | 0 | 0 | P1 | S2 |
| GL50803_10219  | ankyrin repeat protein         | 159 | ankyrin         | 8  | 2  | 14 | 7  | 0 | 0 | 0 | P1 | S2 |
| GL50803_17243  | OAD-beta dynein                | 163 | DHC             | 6  | 0  | 9  | 7  | 0 | 0 | 0 | P1 | S2 |
| GL50803_5375   | Nek kinase GK170               | 45  | kinase          | 15 | 7  | 10 | 6  | 0 | 0 | 0 | P1 | S2 |
| GL50803_17568  | ankyrin repeat protein         | 60  | ankyrin         | 5  | 3  | 7  | 6  | 0 | 0 | 0 | P1 | S2 |
| GL50803_11720  | ankyrin repeat protein         | 48  | ankyrin         | 5  | 0  | 0  | 6  | 0 | 0 | 0 | P1 | S2 |

|                |                                    |     |                 |    |    |    |    |    |   |    |    |    |    |    |
|----------------|------------------------------------|-----|-----------------|----|----|----|----|----|---|----|----|----|----|----|
| GL50803_13766  | ankyrin repeat protein             | 93  | ankyrin         | 7  | 9  | 14 | 5  | 0  | 0 | 0  | P1 | S2 |    |    |
| GL50803_102023 | ankyrin repeat protein             | 92  | ankyrin         | 6  | 0  | 0  | 5  | 0  | 0 | 0  | P1 | S2 |    |    |
| GL50803_112557 | ankyrin repeat protein             | 89  | ankyrin         | 7  | 1  | 0  | 0  | 13 | 0 | 5  | P1 |    | S3 | P3 |
| GL50803_100955 | mitotic spindle checkpoint MAD2    | 23  | horma domain    | 5  | 0  | 0  | 4  | 0  | 5 | 0  | P1 |    | S3 |    |
| GL50803_15446  | hypothetical protein               | 38  | none            | 5  | 0  | 0  | 3  | 0  | 0 | 7  | P1 |    |    | P3 |
| GL50803_4624   | DUF4490 domain protein             | 15  | DUF4490         | 1  | 7  | 0  | 0  | 0  | 0 | 5  | P1 |    |    | P3 |
| GL50803_7207   | hypothetical protein               | 120 | none            | 9  | 2  | 0  | 0  | 0  | 0 | 5  | P1 |    |    | P3 |
| GL50803_16926  | hypothetical protein               | 57  | none            | 15 | 7  | 0  | 2  | 0  | 0 | 3  | P1 |    |    |    |
| GL50803_16998  | conserved hypothetical protein     | 69  | none            | 2  | 5  | 0  | 0  | 0  | 0 | 3  | P1 |    |    |    |
| GL50803_23492  | ankyrin repeat protein             | 82  | ankyrin         | 5  | 13 | 0  | 0  | 0  | 0 | 0  | P1 |    |    |    |
| GL50803_17090  | SAM domain protein                 | 20  | SAM             | 38 | 11 | 0  | 0  | 0  | 0 | 0  | P1 |    |    |    |
| GL50803_101326 | hypothetical protein               | 35  | none            | 0  | 8  | 0  | 0  | 0  | 0 | 0  | P1 |    |    |    |
| GL50803_13651  | hypothetical protein               | 76  | none            | 17 | 7  | 0  | 0  | 0  | 0 | 0  | P1 |    |    |    |
| GL50803_14681  | ankyrin repeat protein             | 56  | ankyrin         | 20 | 3  | 0  | 0  | 0  | 0 | 0  | P1 |    |    |    |
| GL50803_10232  | hypothetical protein               | 74  | none            | 7  | 2  | 0  | 0  | 0  | 0 | 0  | P1 |    |    |    |
| GL50803_15218  | WD-40 repeat protein               | 87  | WD40            | 9  | 0  | 0  | 0  | 0  | 0 | 0  | P1 |    |    |    |
| GL50803_24321  | Nek kinase GK261                   | 32  | kinase          | 8  | 0  | 0  | 0  | 0  | 0 | 0  | P1 |    |    |    |
| GL50803_10527  | hypothetical protein               | 35  | none            | 2  | 0  | 14 | 5  | 17 | 2 | 5  |    | S2 | S3 | P3 |
| GL50803_17097  | ankyrin repeat protein             | 163 | ankyrin         | 0  | 0  | 66 | 13 | 15 |   | 2  |    | S2 | S3 |    |
| GL50803_4239   | hypothetical protein               | 11  | none            | 4  | 0  | 34 | 7  | 8  | 5 | 0  |    | S2 | S3 |    |
| GL50803_16521  | alpha SNAP                         | 32  | SNAP            | 2  | 4  | 21 | 2  | 0  | 5 | 0  |    | S2 | S3 |    |
| GL50803_15918  | hypothetical protein               | 25  | none            | 3  | 0  | 0  | 11 | 0  | 0 | 16 |    | S2 |    | P3 |
| GL50803_16279  | Nek kinase GK256                   | 75  | kinase          | 4  | 1  | 15 | 6  | 4  | 0 | 3  |    | S2 |    |    |
| GL50803_7520   | hypothetical protein               | 54  | none            | 2  | 0  | 41 | 9  | 1  | 0 | 0  |    | S2 |    |    |
| GL50803_16332  | hypothetical protein               | 196 | none            | 0  | 0  | 17 | 18 | 0  | 0 | 0  |    | S2 |    |    |
| GL50803_86761  | hypothetical protein               | 79  | none            | 0  | 0  | 17 | 16 | 0  | 0 | 0  |    | S2 |    |    |
| GL50803_3762   | ankyrin repeat protein             | 82  | ankyrin         | 0  | 0  | 5  | 15 | 0  | 0 | 0  |    | S2 |    |    |
| GL50803_14742  | Nek kinase GK253                   | 33  | kinase          | 3  | 1  | 0  | 13 | 0  | 0 | 0  |    | S2 |    |    |
| GL50803_14345  | hypothetical protein               | 160 | none            | 0  | 0  | 0  | 12 | 0  | 0 | 0  |    | S2 |    |    |
| GL50803_3746   | hypothetical protein               | 119 | none            | 0  | 1  | 12 | 11 | 0  | 0 | 0  |    | S2 |    |    |
| GL50803_16833  | EGF-like domain containing protein | 65  | EGF-like domain | 0  | 0  | 16 | 10 | 0  | 0 | 0  |    | S2 |    |    |
| GL50803_16543  | hypothetical protein               | 64  | none            | 2  | 3  | 5  | 10 | 0  | 0 | 0  |    | S2 |    |    |
| GL50803_13981  | Nek kinase GK185                   | 123 | kinase, ankyrin | 0  | 4  | 33 | 9  | 0  | 0 | 0  |    | S2 |    |    |
| GL50803_9861   | hypothetical protein               | 43  | none            | 0  | 2  | 15 | 9  | 0  | 0 | 0  |    | S2 |    |    |

|                |                                |     |              |   |   |    |   |   |   |    |    |    |    |
|----------------|--------------------------------|-----|--------------|---|---|----|---|---|---|----|----|----|----|
| GL50803_26199  | Nek kinase GK262               | 53  | kinase       | 4 | 1 | 0  | 9 | 0 | 0 | 0  | S2 |    |    |
| GL50803_103807 | ankyrin repeat protein         | 103 | ankyrin      | 0 | 0 | 50 | 7 | 0 | 0 | 0  | S2 |    |    |
| GL50803_10038  | alpha18-giardin                | 32  | annexin      | 0 | 0 | 19 | 6 | 0 | 0 | 0  | S2 |    |    |
| GL50803_14872  | ankyrin repeat protein         | 137 | ankyrin      | 1 | 2 | 14 | 6 | 0 | 0 | 0  | S2 |    |    |
| GL50803_15054  | kelch repeat protein           | 166 | kelch repeat | 3 | 2 | 0  | 6 | 0 | 0 | 0  | S2 |    |    |
| GL50803_15587  | ankyrin repeat protein         | 28  | ankyrin      | 0 | 0 | 0  | 6 | 0 | 0 | 0  | S2 |    |    |
| GL50803_13437  | ankyrin repeat protein         | 35  | ankyrin      | 0 | 0 | 0  | 6 | 0 | 0 | 0  | S2 |    |    |
| GL50803_95787  | hypothetical protein           | 147 | none         | 1 | 4 | 18 | 5 | 0 | 0 | 0  | S2 |    |    |
| GL50803_6939   | dynein intermediate chain IC70 | 70  | DIC          | 2 | 1 | 11 | 5 | 0 | 0 | 0  | S2 |    |    |
| GL50803_14341  | hypothetical protein           | 28  | none         | 0 | 0 | 8  | 5 | 0 | 0 | 0  | S2 |    |    |
| GL50803_95192  | ankyrin repeat protein         | 124 | ankyrin      | 4 | 2 | 0  | 5 | 0 | 0 | 0  | S2 |    |    |
| GL50803_16729  | hypothetical protein           | 41  | none         | 0 | 0 | 0  | 5 | 0 | 0 | 0  | S2 |    |    |
| GL50803_6709   | hypothetical protein           | 58  | none         | 1 | 4 | 0  | 0 | 7 | 0 | 5  |    | S3 | P3 |
| GL50803_14507  | hypothetical protein           | 43  | none         | 0 | 0 | 0  | 0 | 0 | 0 | 10 |    |    | P3 |
| GL50803_11604  | hypothetical protein           | 35  | none         | 2 | 0 | 0  | 2 | 0 | 0 | 8  |    |    | P3 |
| GL50803_13467  | hypothetical protein           | 35  | none         | 2 | 1 | 0  | 2 | 0 | 0 | 7  |    |    | P3 |
| GL50803_17375  | hypothetical protein           | 41  | none         | 0 | 0 | 0  | 2 | 0 | 0 | 7  |    |    | P3 |
| GL50803_12224  | hypothetical protein           | 35  | none         | 2 | 0 | 0  | 0 | 0 | 0 | 7  |    |    | P3 |
| GL50803_4692   | hypothetical protein           | 27  | none         | 0 | 0 | 0  | 0 | 0 | 0 | 7  |    |    | P3 |
| GL50803_14583  | hypothetical protein           | 21  | none         | 0 | 0 | 0  | 0 | 0 | 0 | 6  |    |    | P3 |
| GL50803_29796  | hypothetical protein           | 41  | none         | 0 | 0 | 0  | 0 | 0 | 0 | 6  |    |    | P3 |
| GL50803_15605  | hypothetical protein           | 43  | none         | 0 | 0 | 0  | 0 | 0 | 0 | 5  |    |    | P3 |
